# Supplementary material for: Characterization of Novel Progression Factors in Castration-Resistant Prostate Cancer Based on Global Comparative Proteome Analysis
Source: MDPI journal article supplement (doi:10.3390/cancers13143432), 2021-07-08
Supplement: s1 [file s1]

# Characterization of Novel Progression Factors in Castration-Resistant Prostate Cancer Based on Global Comparative Proteome Analysis

Ann-Yae Na, Soyoung Choi, Eunju Yang, Kwang-Hyeon Liu, Sunghwan Kim, Hyun Jin Jung, Youngshik Choe, Yun-Sok Ha, Tae Gyun Kwon, Jun Nyung Lee and Sangkyu Lee

## Legends of Supplementary Tables and Figures

**Table S1.** Summary of differentially expressed proteins

**Table S2.** Protein list of Group 2

**Table S3.** Protein list of Group 3

**Table S4.** Densitometry readings ratio of each band (A), ELISA reading ratio of 5 proteins (B)

**Figure S1.** Heatmap of Pearson correlation coefficients from all quantified proteins between each pair of samples

**Figure S2.** A comprehensive heatmap for cluster analysis of the enrichment patterns; (A) Biological process, (B) Cellular component, (C) Molecular function, (D) Protein domain.

**Figure S3.** Bioinformatics analysis of differential expressed proteins in T3G3/T3GX/CRPC. (A) GO and KEGG annotation of that increased in T3GX/T3GX group but decreased CRPC/T3G3 group. (B) Protein interactions by STRING network according to group 2 of cluster analysis. (C) GO and KEGG annotation of differential expressed proteins that decreased in T3GX/T3GX group, but increased CRPC/T3G3 group.

**Figure S4.** The Whole blot of five proteins

**Table S2.** Protein list of Group 2.

| Protein accession | Protein description                                                 | MW [kDa] | Gene name | T3GX/<br>T3G3 | CRPC/<br>T3GX | CRPC/<br>T3G3 |
|-------------------|---------------------------------------------------------------------|----------|-----------|---------------|---------------|---------------|
| P10916            | Myosin regulatory light chain 2, ventricular/cardiac muscle isoform | 18.79    | MYL2      | 7.73          | 0.15          | 1.18          |
| P07098            | Gastric triacylglycerol lipase                                      | 45.24    | LIPF      | 6.98          | 0.15          | 1.08          |
| P63316            | Troponin C, slow skeletal and cardiac muscles                       | 18.40    | TNNC1     | 6.29          | 0.13          | 0.80          |
| P45378            | Troponin T, fast skeletal muscle                                    | 31.82    | TNNT3     | 5.99          | 0.23          | 1.38          |
| A0A0B4J1X5        | Immunoglobulin heavy variable 3-74                                  | 12.84    | IGHV3-74  | 5.61          | 0.10          | 0.57          |
| A0A075B6K4        | Immunoglobulin lambda variable 3-10                                 | 12.44    | IGLV3-10  | 5.58          | 0.24          | 1.34          |
| P13805            | Troponin T, slow skeletal muscle                                    | 32.95    | TNNT1     | 4.86          | 0.20          | 0.97          |
| P07451            | Carbonic anhydrase 3                                                | 29.56    | CA3       | 4.80          | 0.15          | 0.74          |
| P01709            | Immunoglobulin lambda variable 2-8                                  | 12.38    | IGLV2-8   | 4.41          | 0.36          | 1.58          |
| P01591            | Immunoglobulin J chain                                              | 18.10    | JCHAIN    | 4.36          | 0.50          | 2.18          |
| Q96A32            | Myosin regulatory light chain 2, skeletal muscle isoform            | 19.01    | MYLPF     | 4.23          | 0.29          | 1.22          |
| P11678            | Eosinophil peroxidase                                               | 81.04    | EPX       | 4.18          | 0.41          | 1.70          |
| Q5VXH5            | PRAME family member 7                                               | 53.63    | PRAMEF7   | 4.04          | 0.32          | 1.28          |
| P14649            | Myosin light chain 6B                                               | 22.76    | MYL6B     | 3.98          | 0.35          | 1.38          |
| P30711            | Glutathione S-transferase theta-1                                   | 27.34    | GSTT1     | 3.96          | 0.34          | 1.34          |
| Q05315            | Galectin-10                                                         | 16.45    | CLC       | 3.92          | 0.26          | 1.00          |
| P19237            | Troponin I, slow skeletal muscle                                    | 21.69    | TNNI1     | 3.87          | 0.29          | 1.11          |
| P05976            | Myosin light chain 1/3, skeletal muscle isoform                     | 21.15    | MYL1      | 3.81          | 0.47          | 1.77          |
| P02144            | Myoglobin                                                           | 17.18    | MB        | 3.73          | 0.19          | 0.71          |
| P08590            | Myosin light chain 3                                                | 21.93    | MYL3      | 3.60          | 0.46          | 1.67          |
| P12724            | Eosinophil cationic protein                                         | 18.39    | RNASE3    | 3.44          | 0.28          | 0.96          |
| P01714            | Immunoglobulin lambda variable 3-19                                 | 12.04    | IGLV3-19  | 3.30          | 0.41          | 1.35          |
| P0DOX8            | Immunoglobulin lambda-1 light chain                                 | 22.83    | ---       | 3.01          | 0.46          | 1.40          |
| P0DOX5            | Immunoglobulin gamma-1 heavy chain                                  | 49.33    | ---       | 2.96          | 0.27          | 0.81          |
| P13929            | Beta-enolase                                                        | 46.99    | ENO3      | 2.95          | 0.31          | 0.91          |
| A2RTY3            | Protein HEATR9                                                      | 65.68    | HEATR9    | 2.94          | 0.20          | 0.58          |
| P12883            | Myosin-7                                                            | 223.09   | MYH7      | 2.91          | 0.39          | 1.13          |
| P01833            | Polymeric immunoglobulin receptor                                   | 83.28    | PIGR      | 2.89          | 0.40          | 1.16          |
| P01834            | Immunoglobulin kappa constant                                       | 11.77    | IGKC      | 2.85          | 0.44          | 1.24          |
| A0A075B6I9        | Immunoglobulin lambda variable 7-46                                 | 12.47    | IGLV7-46  | 2.70          | 0.44          | 1.19          |
| A0A0B4J2H0        | Immunoglobulin heavy variable 1-69D                                 | 12.66    | IGHV1-69D | 2.54          | 0.37          | 0.95          |

|            |                                       |       |          |      |      |      |
|------------|---------------------------------------|-------|----------|------|------|------|
| A0A075B6H9 | Immunoglobulin lambda variable 4-69   | 12.77 | IGLV4-69 | 2.46 | 0.40 | 0.98 |
| Q0D2J5     | Zinc finger protein 763               | 46.10 | ZNF763   | 2.46 | 0.19 | 0.47 |
| P09488     | Glutathione S-transferase Mu 1        | 25.71 | GSTM1    | 2.36 | 0.15 | 0.35 |
| P25189     | Myelin protein P0                     | 27.55 | MPZ      | 2.28 | 0.50 | 1.13 |
| P02743     | Serum amyloid P-component             | 25.39 | APCS     | 2.25 | 0.45 | 1.01 |
| P60903     | Protein S100-A10                      | 11.20 | S100A10  | 2.24 | 0.33 | 0.74 |
| P17540     | Creatine kinase S-type, mitochondrial | 47.50 | CKMT2    | 2.20 | 0.45 | 1.00 |
| P59666     | Neutrophil defensin 3                 | 10.25 | DEFA3    | 2.15 | 0.47 | 1.01 |
| Q9BVA1     | Tubulin beta-2B chain                 | 49.95 | TUBB2B   | 2.02 | 0.30 | 0.61 |
| A0A0C4DH31 | Immunoglobulin heavy variable 1-18    | 12.82 | IGHV1-18 | 2.00 | 0.27 | 0.54 |

Table S3. Protein list of Group 3.

| <i>Protein accession</i> | <i>Protein description</i>                                | <i>MW [kDa]</i> | <i>Gene name</i> | <i>T3GX<br/>/T3G3</i> | <i>CRPC<br/>/T3GX</i> | <i>CRPC<br/>/T3G3</i> |
|--------------------------|-----------------------------------------------------------|-----------------|------------------|-----------------------|-----------------------|-----------------------|
| Q00796                   | Sorbitol dehydrogenase                                    | 38.32           | SORD             | 0.30                  | 3.02                  | 0.91                  |
| P16870                   | Carboxypeptidase E                                        | 53.15           | CPE              | 0.32                  | 2.54                  | 0.80                  |
| Q29836                   | HLA class I histocompatibility antigen, B-67 alpha chain  | 40.34           | HLA-B            | 0.35                  | 9.02                  | 3.17                  |
| P14555                   | Phospholipase A2, membrane associated                     | 16.08           | PLA2G2A          | 0.41                  | 2.53                  | 1.04                  |
| P80723                   | Brain acid soluble protein 1                              | 22.69           | BASP1            | 0.42                  | 7.95                  | 3.35                  |
| Q7Z5M5                   | Transmembrane channel-like protein 3                      | 125.68          | TMC3             | 0.43                  | 3.94                  | 1.68                  |
| O76054                   | SEC14-like protein 2                                      | 46.15           | SEC14L2          | 0.45                  | 2.40                  | 1.09                  |
| Q6ZSS7                   | Major facilitator superfamily domain-containing protein 6 | 88.09           | MFS6             | 0.46                  | 3.33                  | 1.54                  |
| Q07092                   | Collagen alpha-1(XVI) chain                               | 157.75          | COL16A1          | 0.47                  | 2.09                  | 0.98                  |
| Q53GD3                   | Choline transporter-like protein 4                        | 79.25           | SLC44A4          | 0.49                  | 3.09                  | 1.51                  |
| P28907                   | ADP-ribosyl cyclase/cyclic ADP-ribose hydrolase 1         | 34.33           | CD38             | 0.49                  | 2.43                  | 1.19                  |
| Q9Y394                   | Dehydrogenase/reductase SDR family member 7               | 38.30           | DHRS7            | 0.49                  | 2.46                  | 1.21                  |
| P49327                   | Fatty acid synthase                                       | 273.42          | FASN             | 0.50                  | 2.68                  | 1.35                  |
| Q9ULV0                   | Unconventional myosin-Vb                                  | 213.67          | MYO5B            | 0.50                  | 2.04                  | 1.03                  |

Table S4A. Densitometry readings ratio of each band.

| Proteins | Normalized ratio (vs $\beta$ -actin) (n=3) |      |       |      |       |      |      |      |       |      |       |      |
|----------|--------------------------------------------|------|-------|------|-------|------|------|------|-------|------|-------|------|
|          | BPH                                        |      | T2G2  |      | T3G2  |      | T3G3 |      | T3GX  |      | CRPC  |      |
|          | AVE                                        | SE   | AVE   | SE   | AVE   | SE   | AVE  | SE   | AVE   | SE   | AVE   | SE   |
| FOXA1    | 1.00                                       | 0.00 | 5.21  | 1.29 | 5.46  | 0.76 | 1.10 | 0.33 | 17.57 | 2.21 | 48.71 | 3.42 |
| TSBP1    | 1.00                                       | 0.00 | 29.93 | 6.89 | 17.36 | 4.26 | 5.78 | 1.33 | 4.08  | 1.59 | 0.67  | 0.24 |
| HMG1     | 1.00                                       | 0.00 | 6.09  | 1.43 | 7.98  | 2.75 | 8.93 | 1.82 | 16.80 | 4.08 | 23.18 | 3.86 |
| HMG2     | 1.00                                       | 0.00 | 3.67  | 1.46 | 4.06  | 1.94 | 4.30 | 1.38 | 17.18 | 5.42 | 33.70 | 3.93 |
| HMG3     | 1.00                                       | 0.00 | 1.19  | 0.46 | 1.21  | 0.29 | 1.22 | 0.41 | 7.04  | 2.91 | 23.85 | 3.53 |

Table S4B. ELISA reading ratio of 5 proteins.

| Proteins | Relative % of BPH (n=3) |      |        |       |        |       |        |       |        |       |        |       |
|----------|-------------------------|------|--------|-------|--------|-------|--------|-------|--------|-------|--------|-------|
|          | BPH                     |      | T2G2   |       | T3G2   |       | T3G3   |       | T3GX   |       | CRPC   |       |
|          | AVE                     | SE   | AVE    | SE    | AVE    | SE    | AVE    | SE    | AVE    | SE    | AVE    | SE    |
| FOXA1    | 100.00                  | 5.70 | 139.39 | 15.76 | 144.21 | 13.15 | 153.95 | 12.02 | 184.39 | 13.19 | 256.84 | 15.41 |
| TSBP1    | 100.00                  | 9.04 | 274.70 | 9.62  | 272.27 | 12.62 | 210.24 | 4.77  | 167.55 | 14.29 | 106.31 | 10.99 |
| HMG1     | 100.00                  | 3.12 | 99.57  | 2.33  | 100.08 | 2.69  | 107.70 | 7.73  | 119.70 | 8.55  | 143.06 | 7.69  |
| HMG2     | 100.00                  | 7.96 | 107.34 | 6.51  | 122.13 | 12.60 | 131.63 | 4.89  | 176.47 | 10.41 | 196.52 | 13.74 |
| HMG3     | 100.00                  | 8.08 | 96.22  | 5.02  | 106.33 | 9.90  | 107.50 | 11.62 | 130.42 | 9.88  | 175.78 | 9.66  |

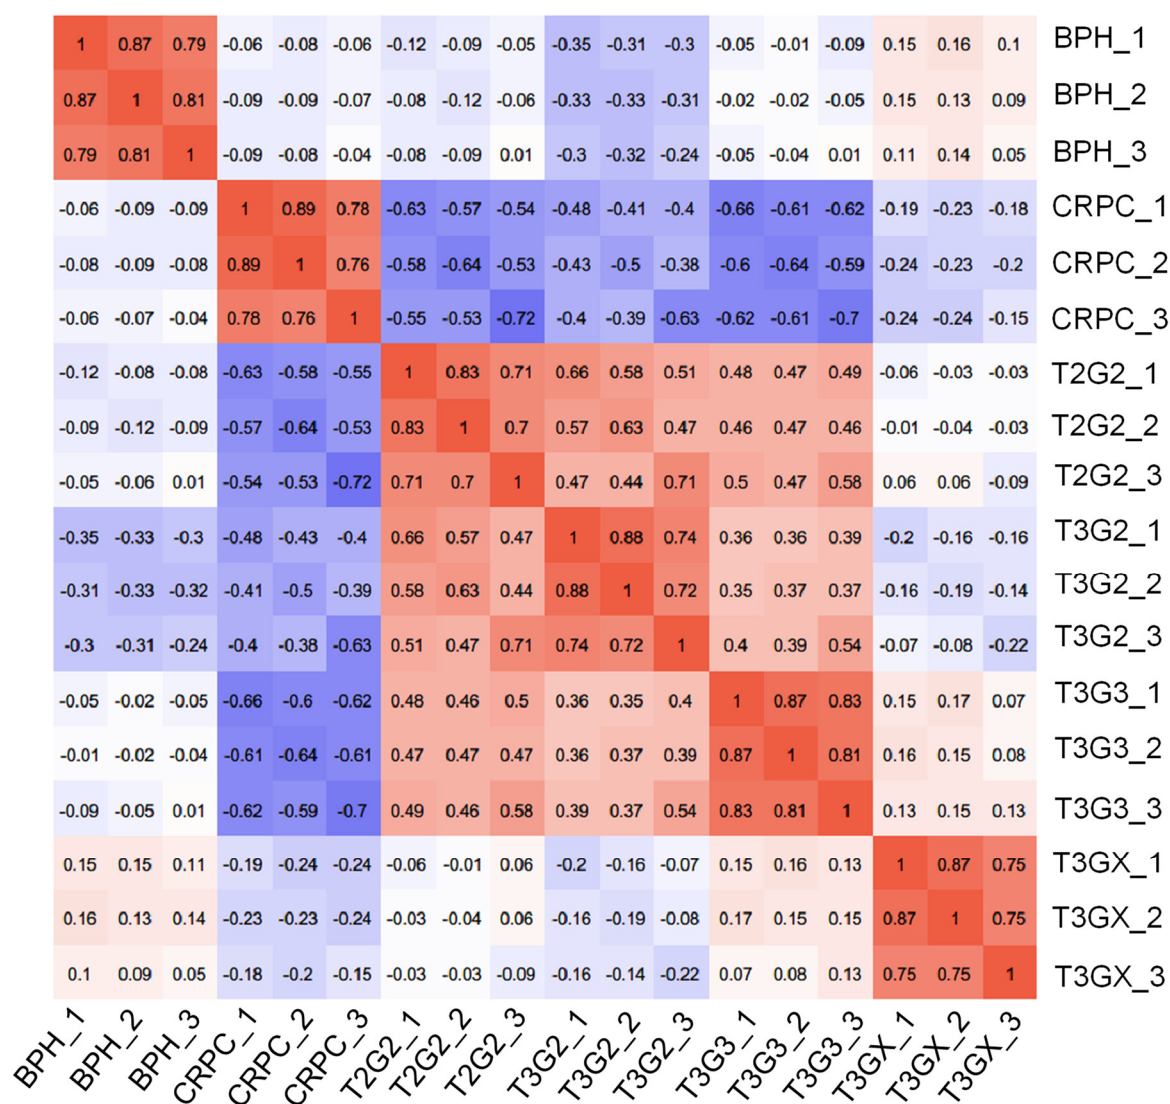

**Figure S1.** Heatmap of Pearson correlation coefficients from all quantified proteins between each pair of samples.

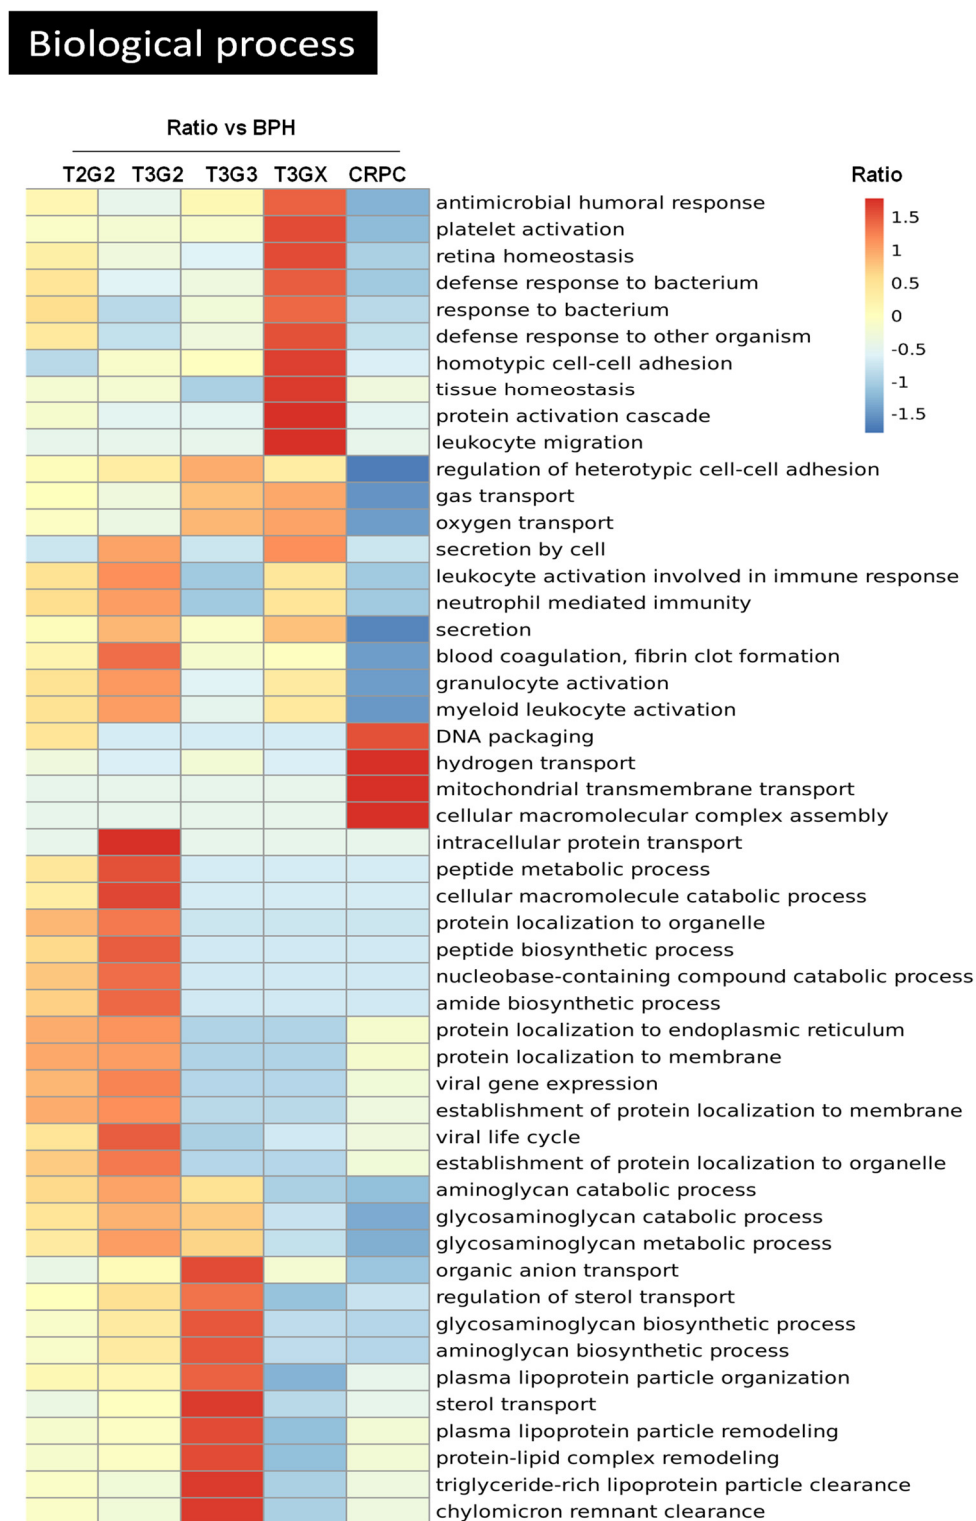

**Figure S2. A comprehensive heatmap for cluster analysis of the enrichment patterns;** (A) Biological process, (B) Cellular component, (C) Molecular function, (D) Protein domain (Continued).

## Cellular component

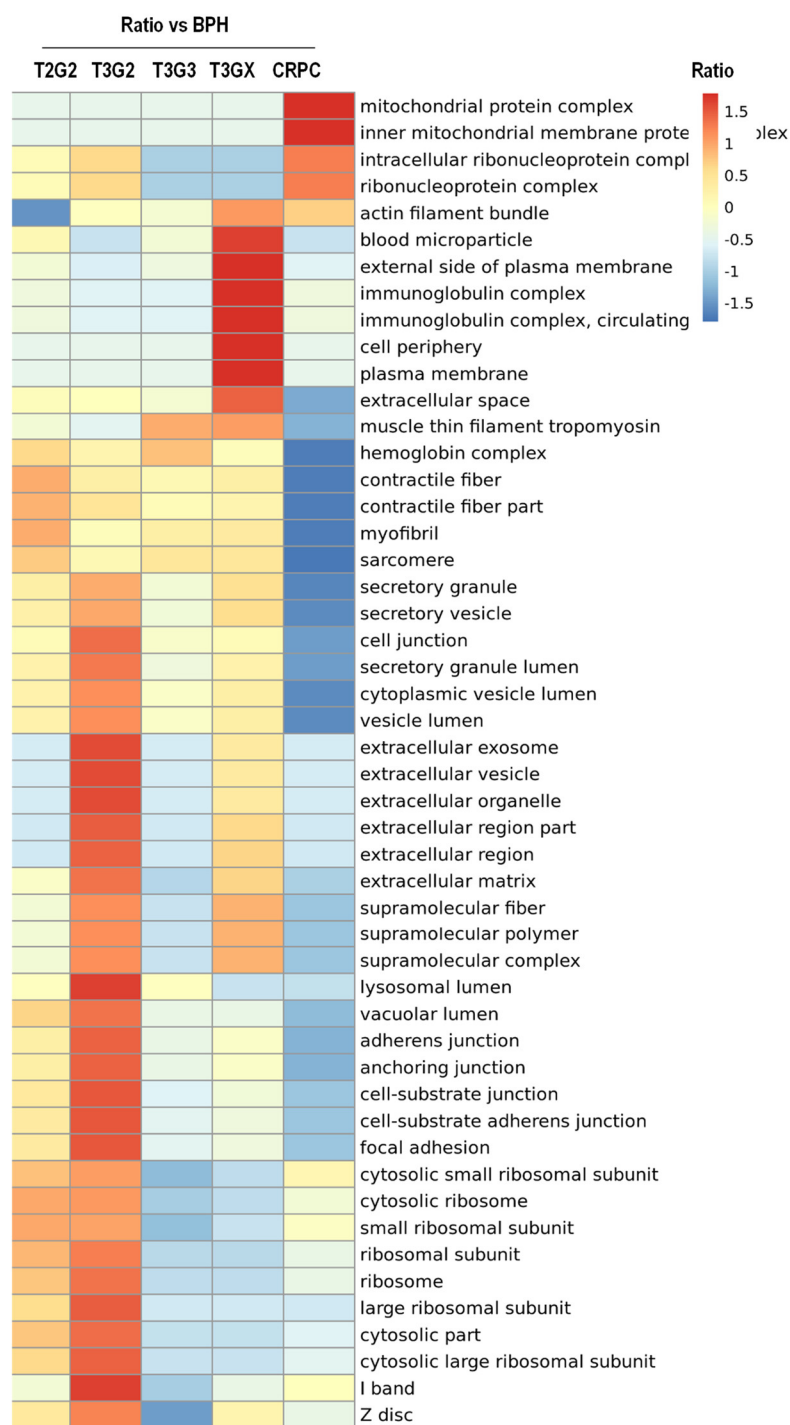

**Figure S2. A comprehensive heatmap for cluster analysis of the enrichment patterns;** (A) Biological process, (B) Cellular component, (C) Molecular function, (D) Protein domain (Continued).

## Molecular Function

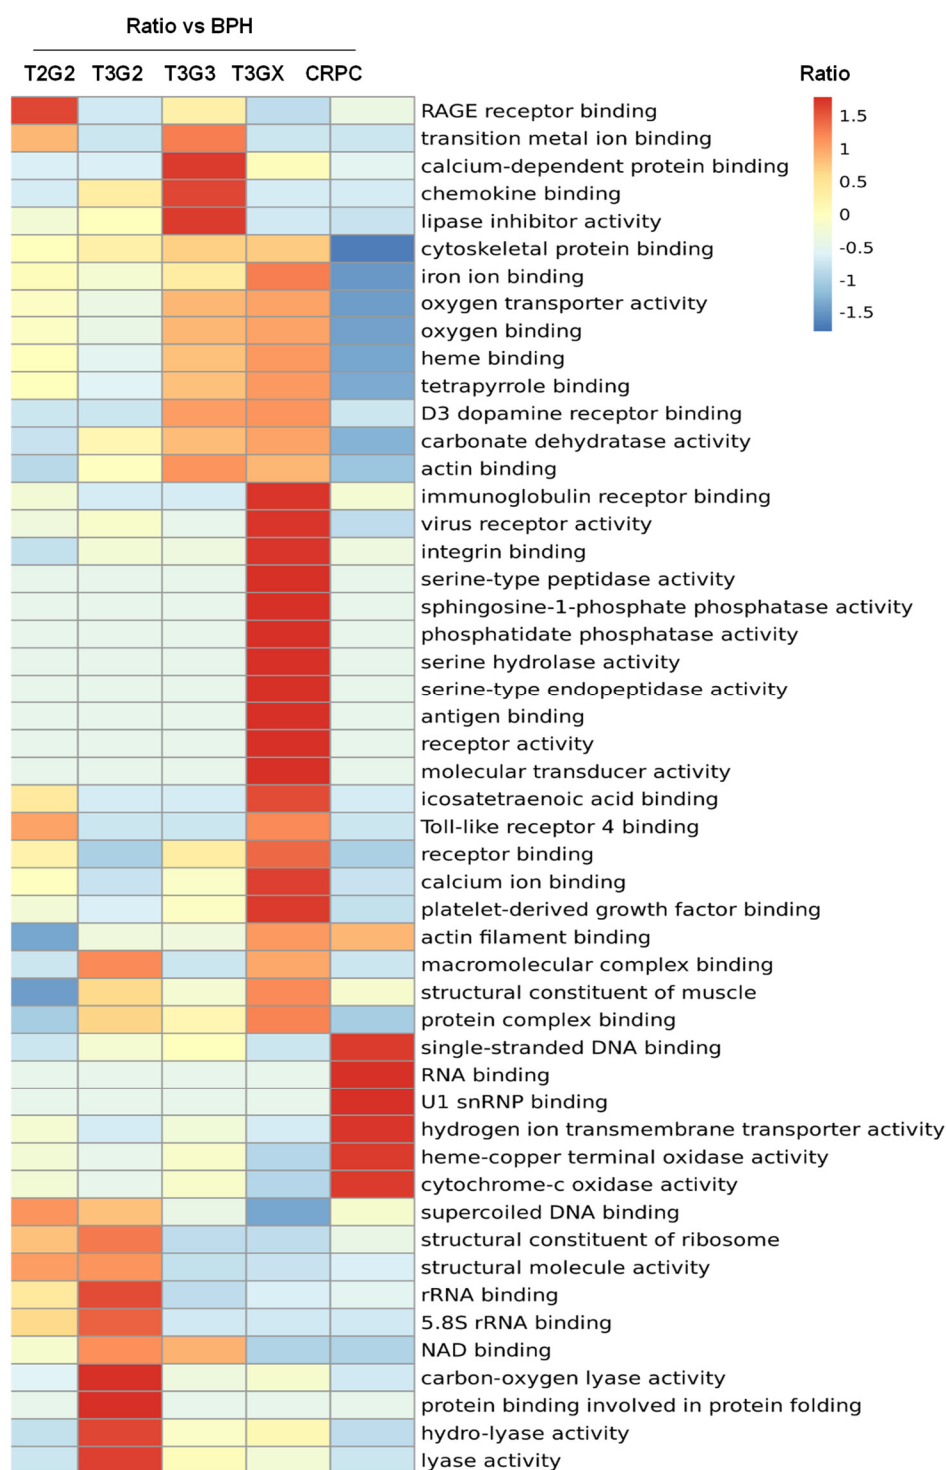

**Figure S2.** A comprehensive heatmap for cluster analysis of the enrichment patterns; (A) Biological process, (B) Cellular component, (C) Molecular function, (D) Protein domain (Continued).

## Protein domain

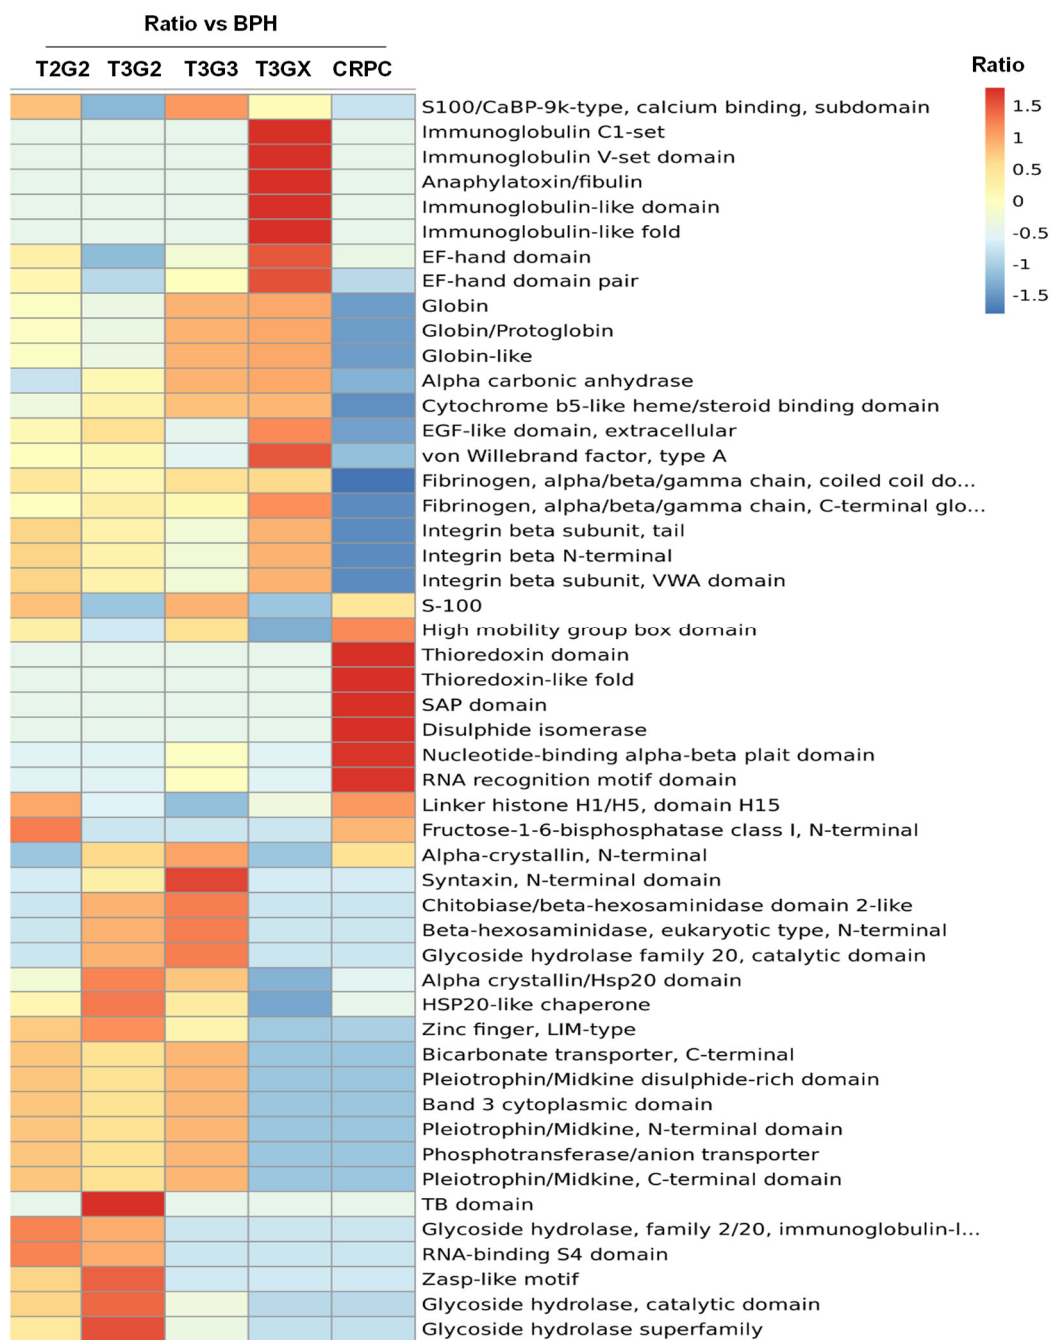

**Figure S2. A comprehensive heatmap for cluster analysis of the enrichment patterns;** (A) Biological process, (B) Cellular component, (C) Molecular function, (D) Protein domain.



## (A) Group 2

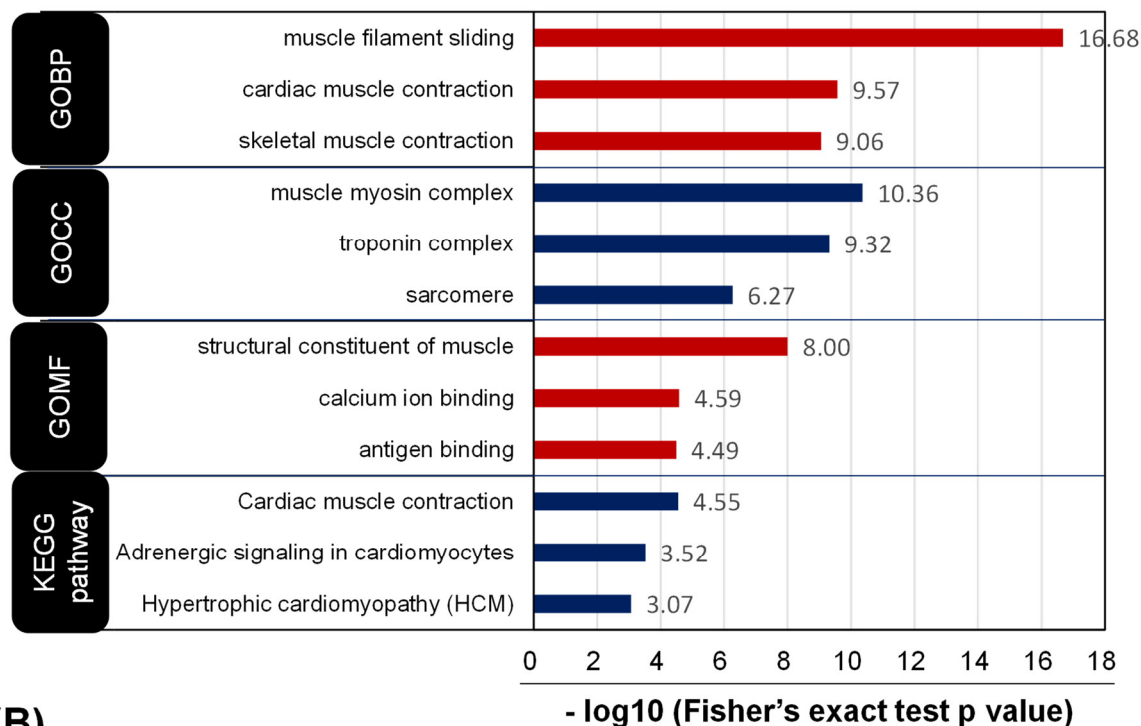

## (B)

## Group 2

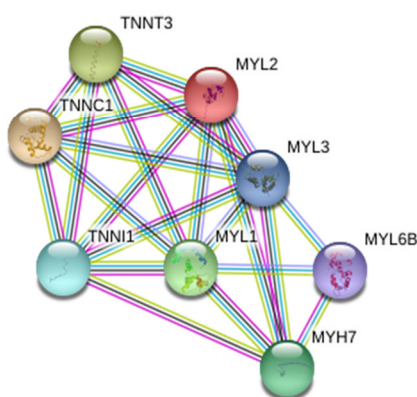

**Figure S3. Bioinformatics analysis of differential expressed proteins in T3G3/T3GX/CRPC.** (A) GO and KEGG annotation of that increased in T3GX/T3GX group but decreased CRPC/T3G3 group. (B) Protein interactions by STRING network according to group 2 of cluster analysis. (C) GO and KEGG annotation of differential expressed proteins that decreased in T3GX/T3GX group, but increased CRPC/T3G3 group (Continued).



**(C) Group 3**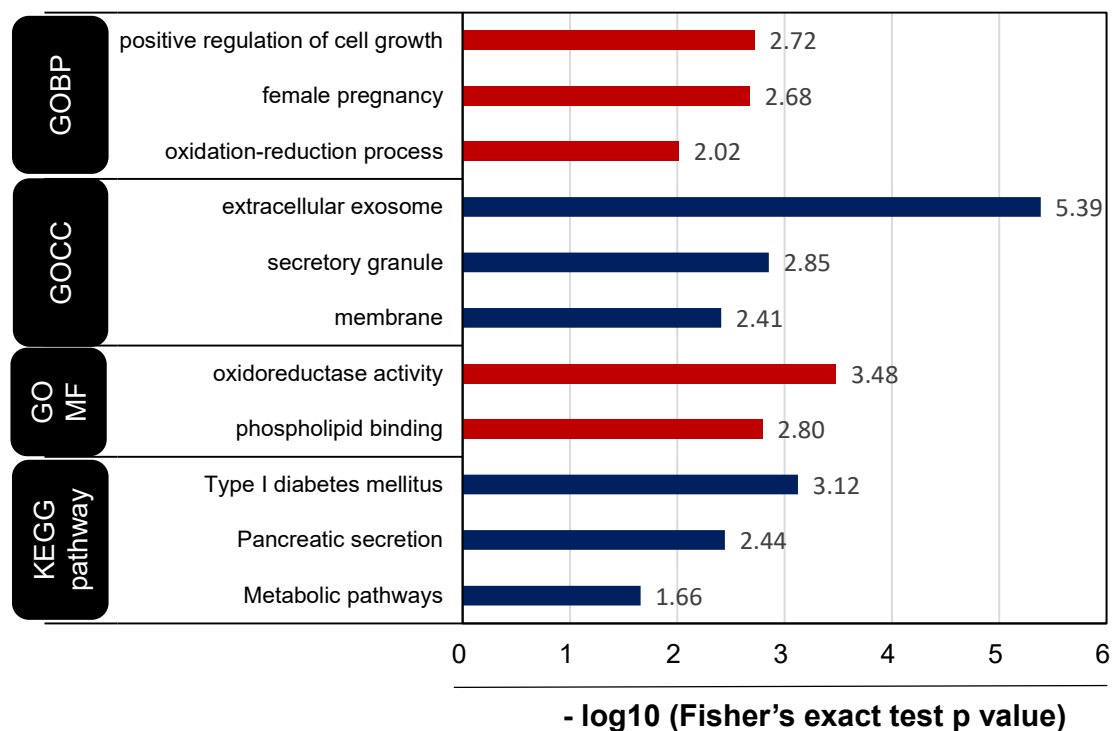

**Figure S3. Bioinformatics analysis of differential expressed proteins in T3G3/T3GX/CRPC.** (A) GO and KEGG annotation of that increased in T3GX/T3GX group but decreased CRPC/T3G3 group. (B) Protein interactions by STRING network according to group 2 of cluster analysis. (C) GO and KEGG annotation of differential expressed proteins that decreased in T3GX/T3GX group, but increased CRPC/T3G3 group.

**FOXA1**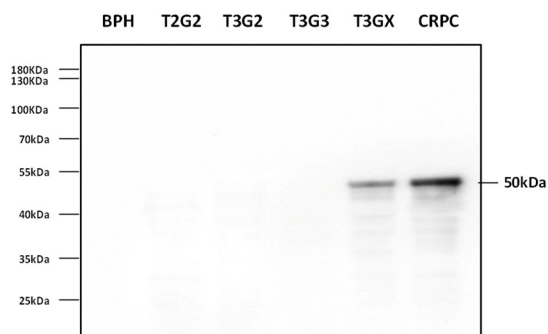**TSBP1**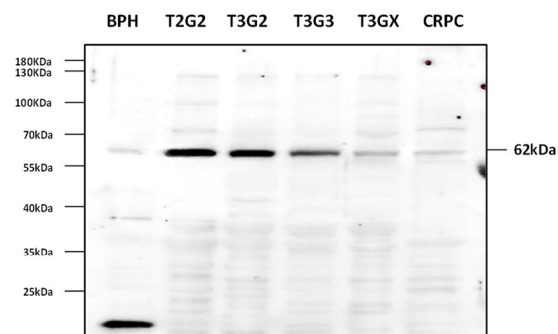**HMGN1**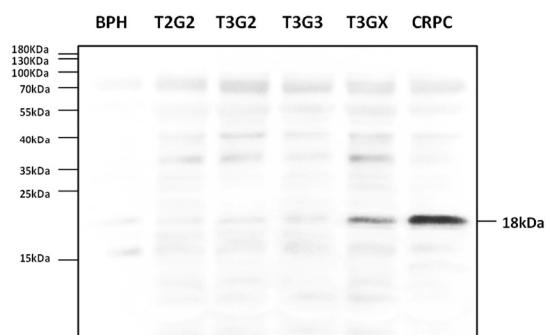**HMGN2**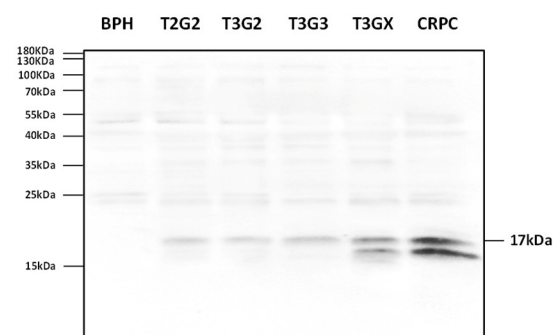**HMGN3**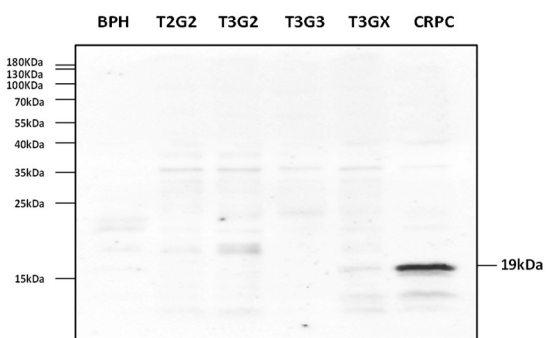 **$\beta$ -actin**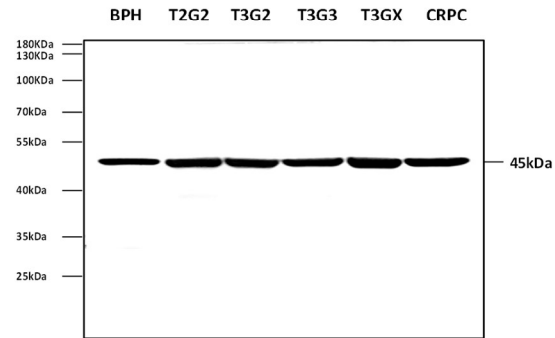**Figure S4A.** The Whole blot of five proteins.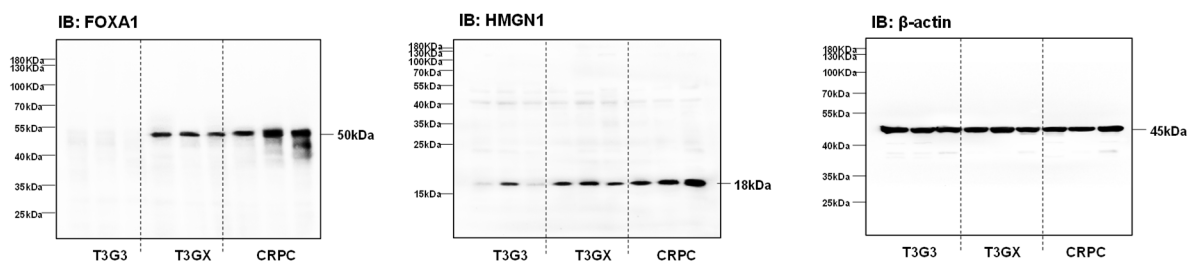**Figure S4B.** The Individual whole blot of FOXA1 and HMGN1.
